# Supplementary material
Source: PubMed Central journal article supplement (PMC8278339)

A.

### ACE2 protein expression by presence of asthma

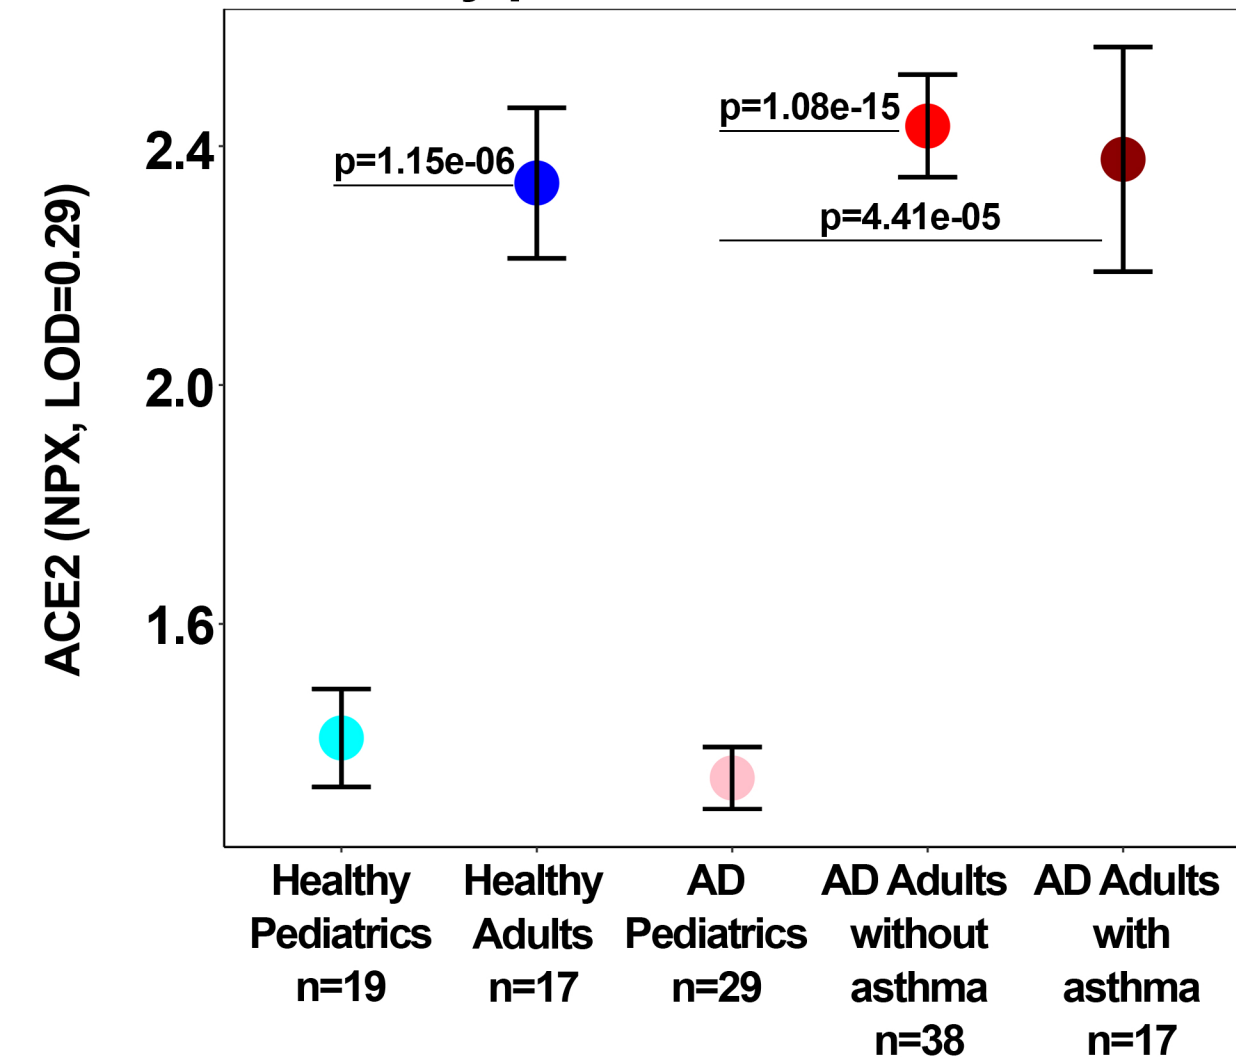

B.

### Spearman correlation of ACE2 protein expression with SCORAD

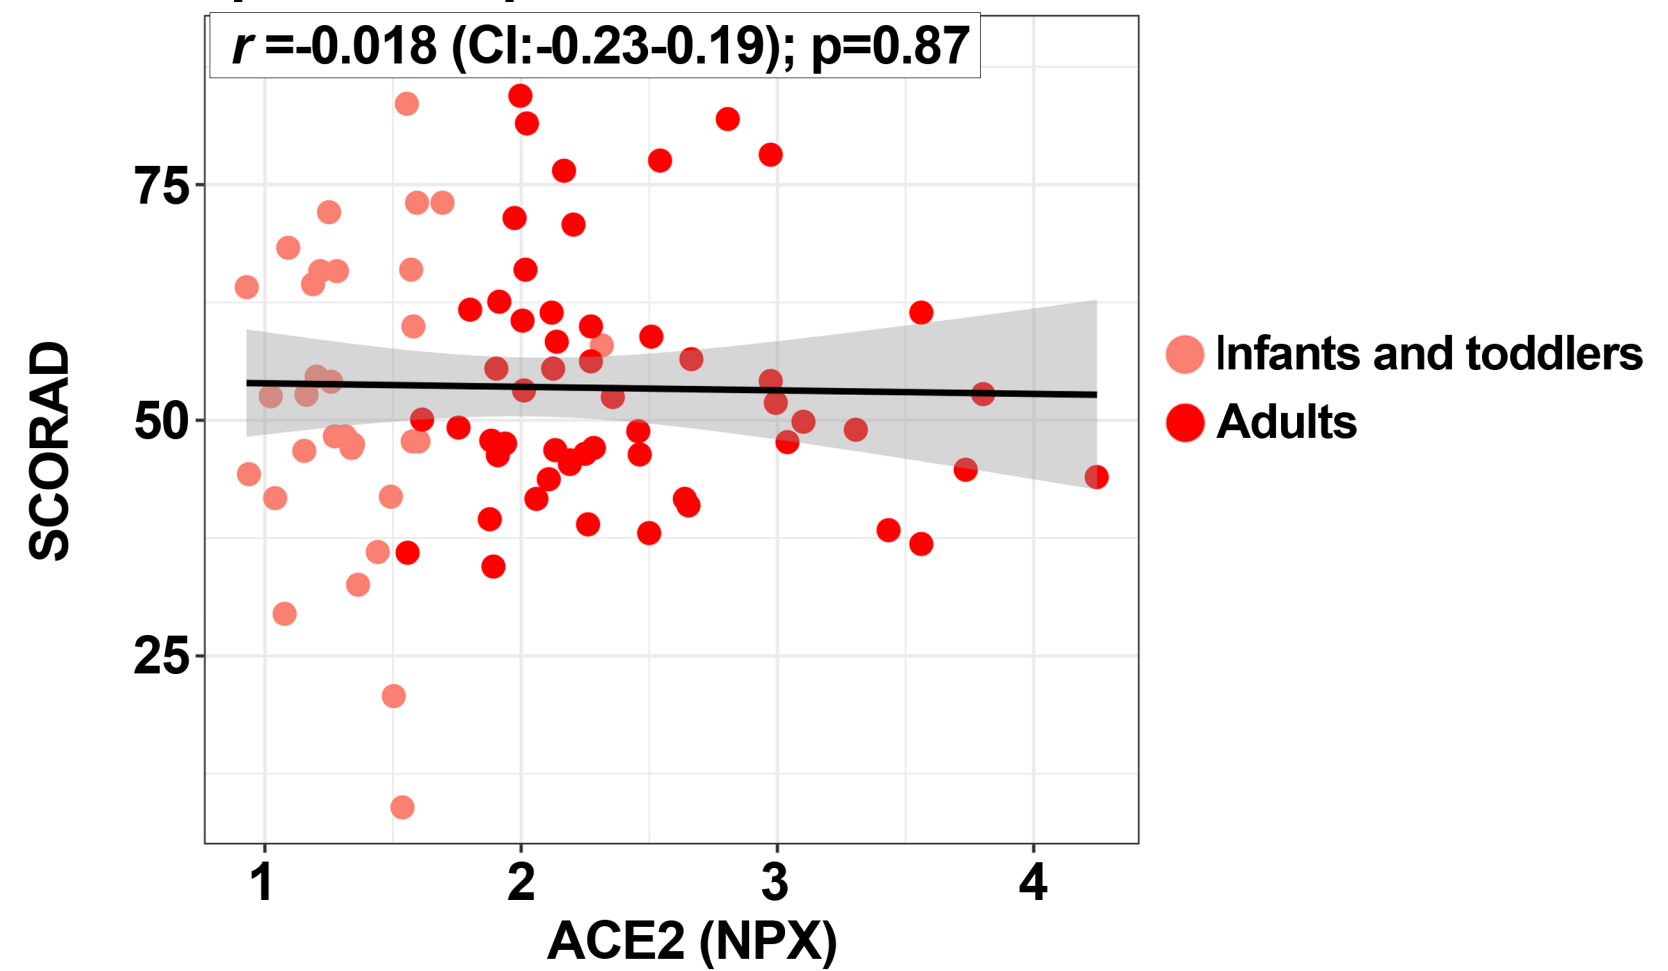

C.

### ACE2 protein expression by race

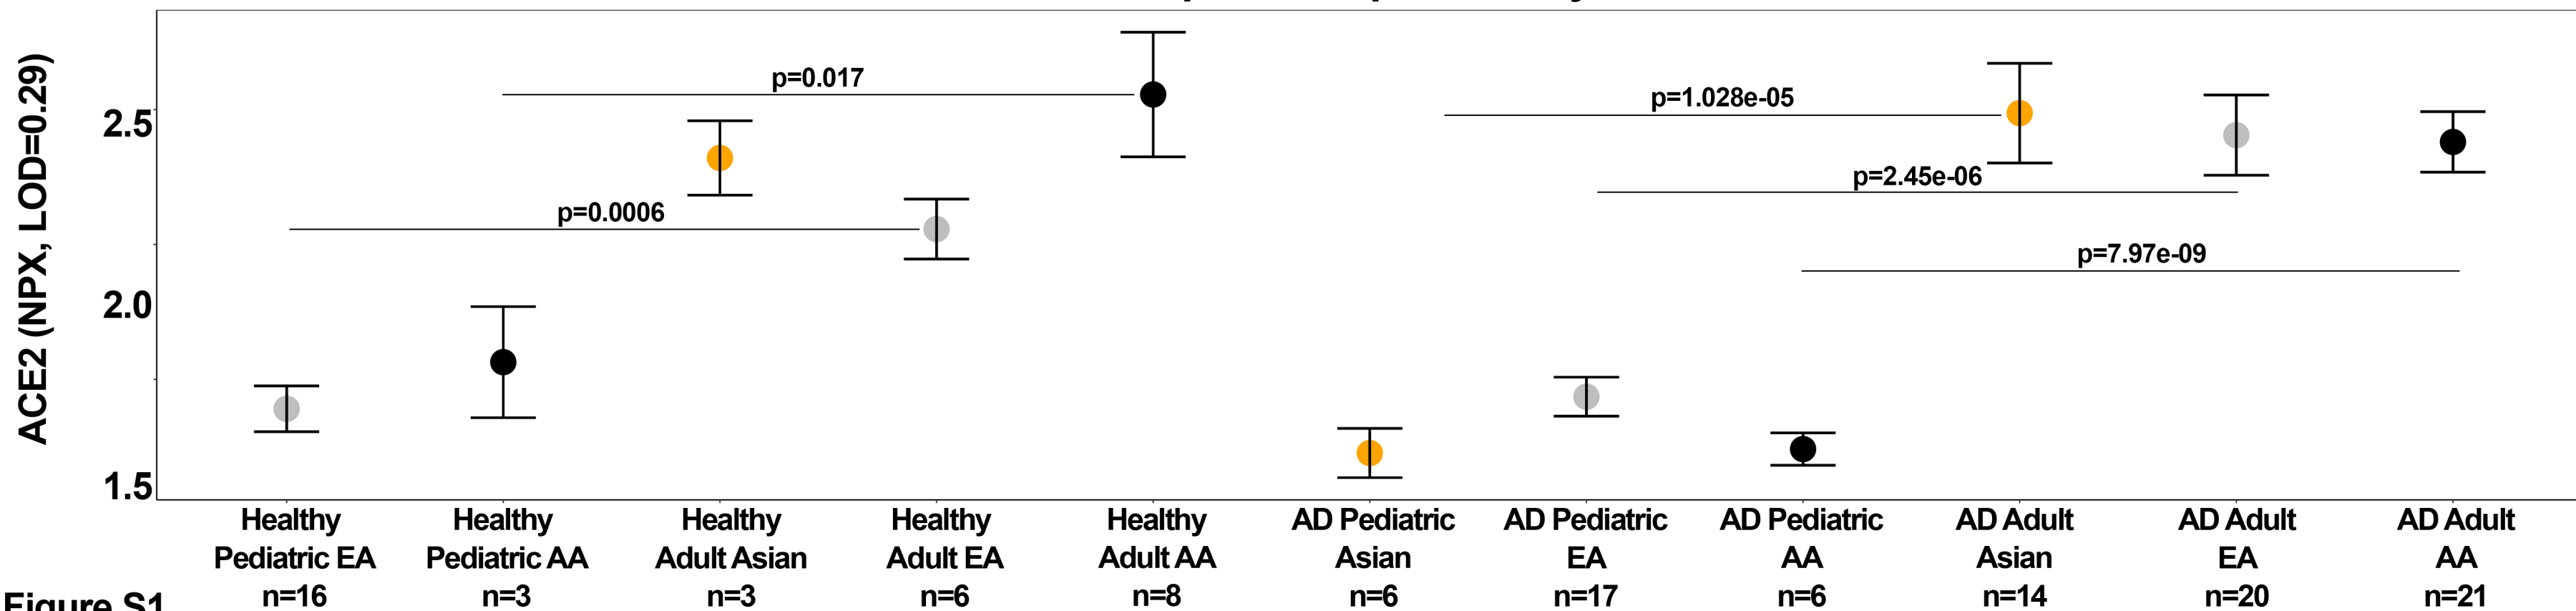

Supplement: NIHMS1716707-supplement-Fig1s.pdf [file NIHMS1716707-supplement-Fig1s.pdf]
